# Supplementary material for: A MACS protocol for purification of untouched germinal center B cells from unimmunized or germinal center-induced mice
Source: PubMed Central journal article supplement — STAR Protoc. 2022 May 14;3(2):101388. doi: 10.1016/j.xpro.2022.101388 (PMC9117920; doi:10.1016/j.xpro.2022.101388), 2022-05-14
Supplement: mmc1.pdf [file mmc1.pdf]

**Figure S1. Flow cytometry analysis of the purity of isolated GC B cells with different gating sequences, related to flow cytometry analysis following Step 31**

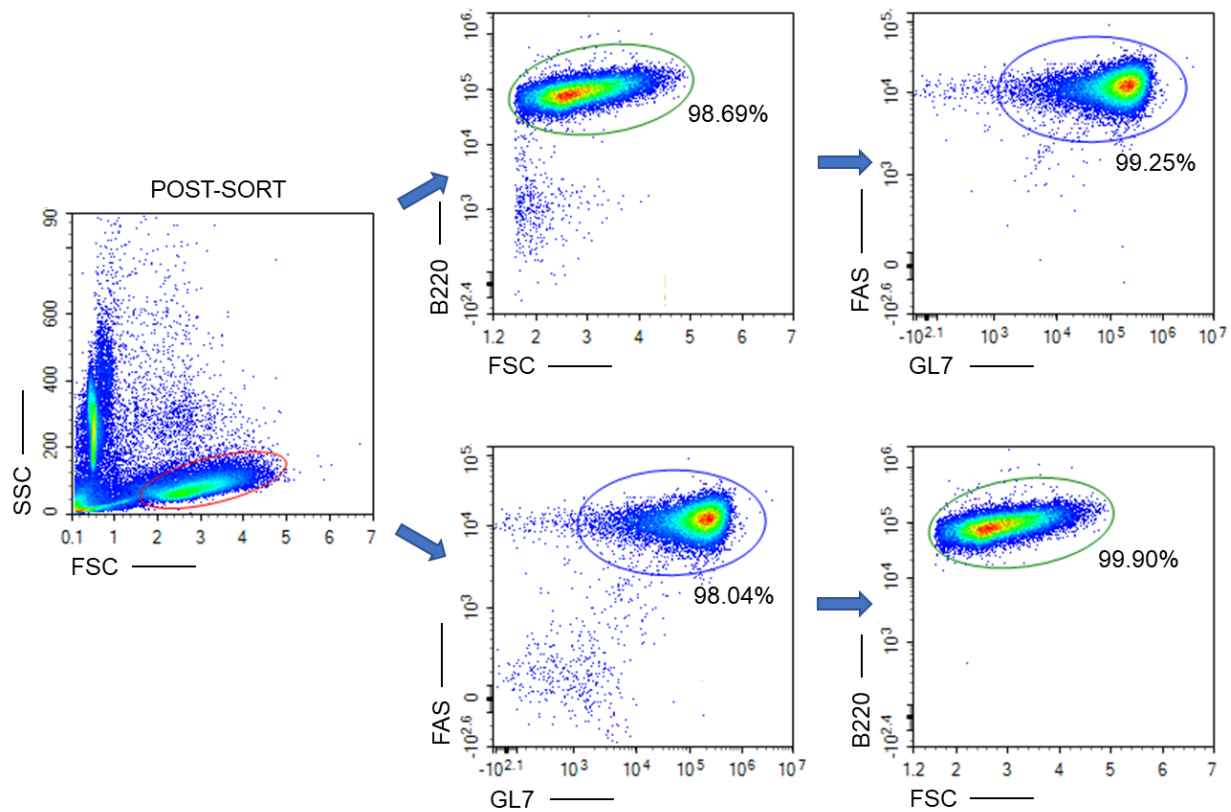

**Figure S1: Flow cytometry analysis of the purity of isolated GC B cells with different gating sequences, related to flow cytometry analysis following Step 31.** Using gating sequence of lymphocytes > B220 > GL7/FAS, the purity of B220<sup>+</sup> cells and B220<sup>+</sup>GL7<sup>+</sup>FAS<sup>+</sup> cells are 98.69% and 99.25% respectively (Upper). The final purity of B220<sup>+</sup>GL7<sup>+</sup>FAS<sup>+</sup> GC B cells is 98.69% x 99.25% = 97.94%. Using gating sequence of lymphocytes > GL7/FAS > B220, the purities of GL7<sup>+</sup>FAS<sup>+</sup> cells and GL7<sup>+</sup>FAS<sup>+</sup>B220<sup>+</sup> cells are 98.04% and 99.90% respectively (Lower). The final purity of B220<sup>+</sup>GL7<sup>+</sup>FAS<sup>+</sup> GC B cells is 98.04% x 99.90% = 97.94%. Therefore, the results of purity are not affected by the gating sequences.

**Figure S2. Flow cytometry analysis of non-viable cells in isolated GC B cells, related to Step 24**

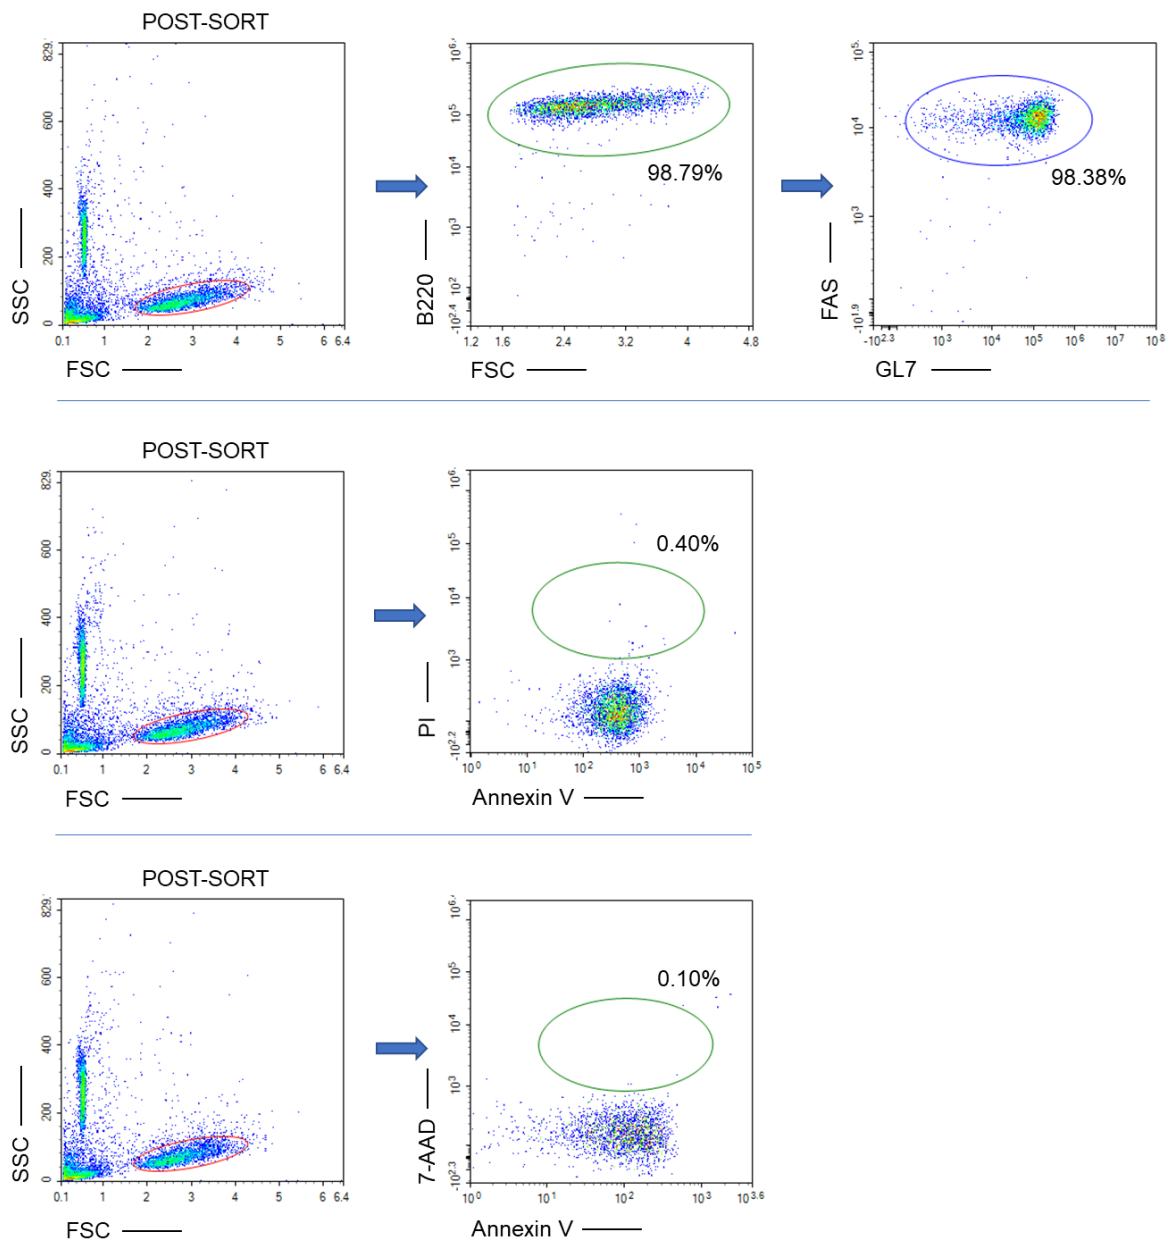

**Figure S2: Flow cytometry analysis of non-viable cells in isolated GC B cells, related to Step 24.** A representative analysis showing the proportions of B220<sup>+</sup>GL7<sup>+</sup>FAS<sup>+</sup> GC B cells (Upper), propidium iodide (PI)<sup>+</sup>Annexin V<sup>+</sup> non-viable cells (Middle), and 7-AAD<sup>+</sup>Annexin V<sup>+</sup> non-viable cells (Lower) in an isolated GC B cell population.
